# Supplementary material for: Polarization-enhanced photoelectric performance in a molecular ferroelectric hexane-1,6-diammonium pentaiodobismuth (HDA-BiI5)-based solar device
Source: Royal Society of Chemistry journal article supplement (doi:10.1039/c9ra10839d), 2020-01-01
Supplement: c9ra10839d1.pdf [file c9ra10839d1.pdf]

Supplementary Information to

**Polarization-enhanced Photoelectric Performance in Molecular  
Ferroelectric Hexane-1,6-diammonium Pentaiodobismuth (HDA-BiI<sub>5</sub>)-  
based solar device**

***Xinyue Liu,<sup>a</sup> Ganghua Zhang,<sup>\*b</sup> Mingjun Zhu,<sup>b</sup> Wenbo Chen,<sup>a</sup> Qi Zou<sup>\*a</sup> and Tao Zeng<sup>\*b,c</sup>***

*<sup>a</sup>Shanghai Key Laboratory of Materials Protection and Advanced Materials in Electric Power, Shanghai University of Electric Power, Shanghai 200090, China.*

*<sup>b</sup>Shanghai Key Laboratory of Engineering Materials Application and Evaluation, Shanghai Research Institute of Materials, Shanghai 200437, P.R. China.*

*<sup>c</sup>Advanced Science Research Laboratory, Saitama Institute of Technology, Okabe, Saitama 369-0293, Japan.*

This PDF file includes:

Figures. S1 to S6

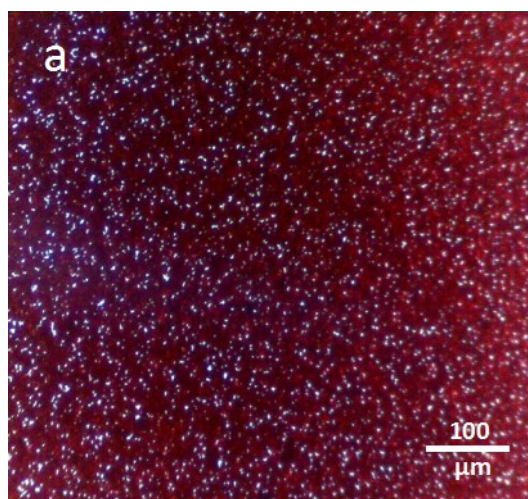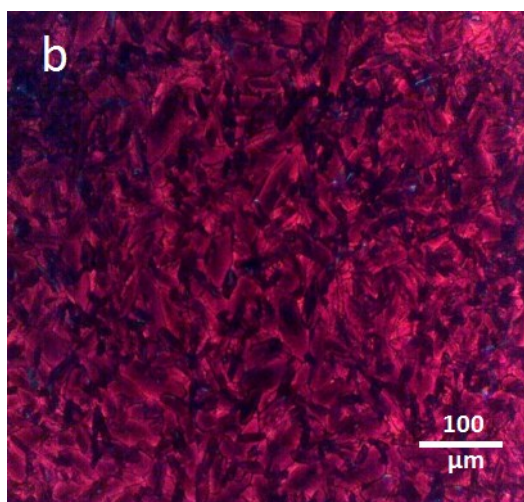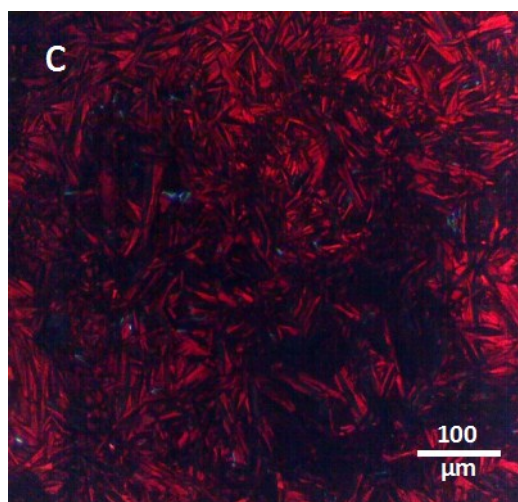

**Figure S1.** Optical photograph of HDA-Bil<sub>5</sub> thin films with different thicknesses of 35 μm (a), 25 μm (b) and 10 μm (c).

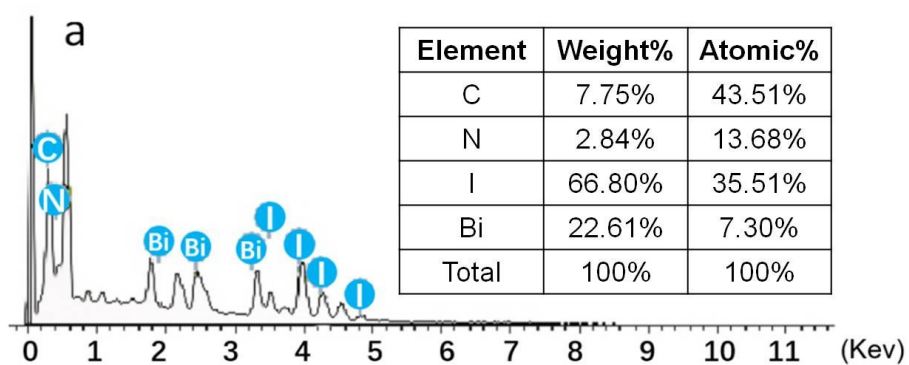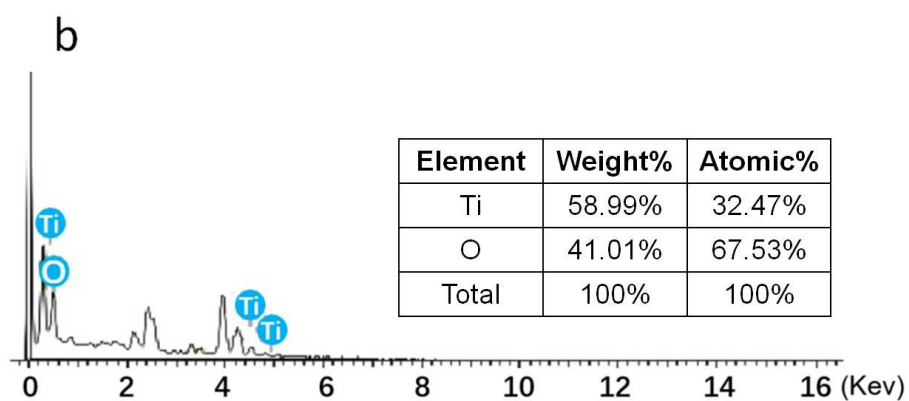

**Figure S2.** EDS spectra of HDA-BiI<sub>5</sub> (a) and TiO<sub>2</sub> (b) in HDA-BiI<sub>5</sub>/TiO<sub>2</sub> composite film.

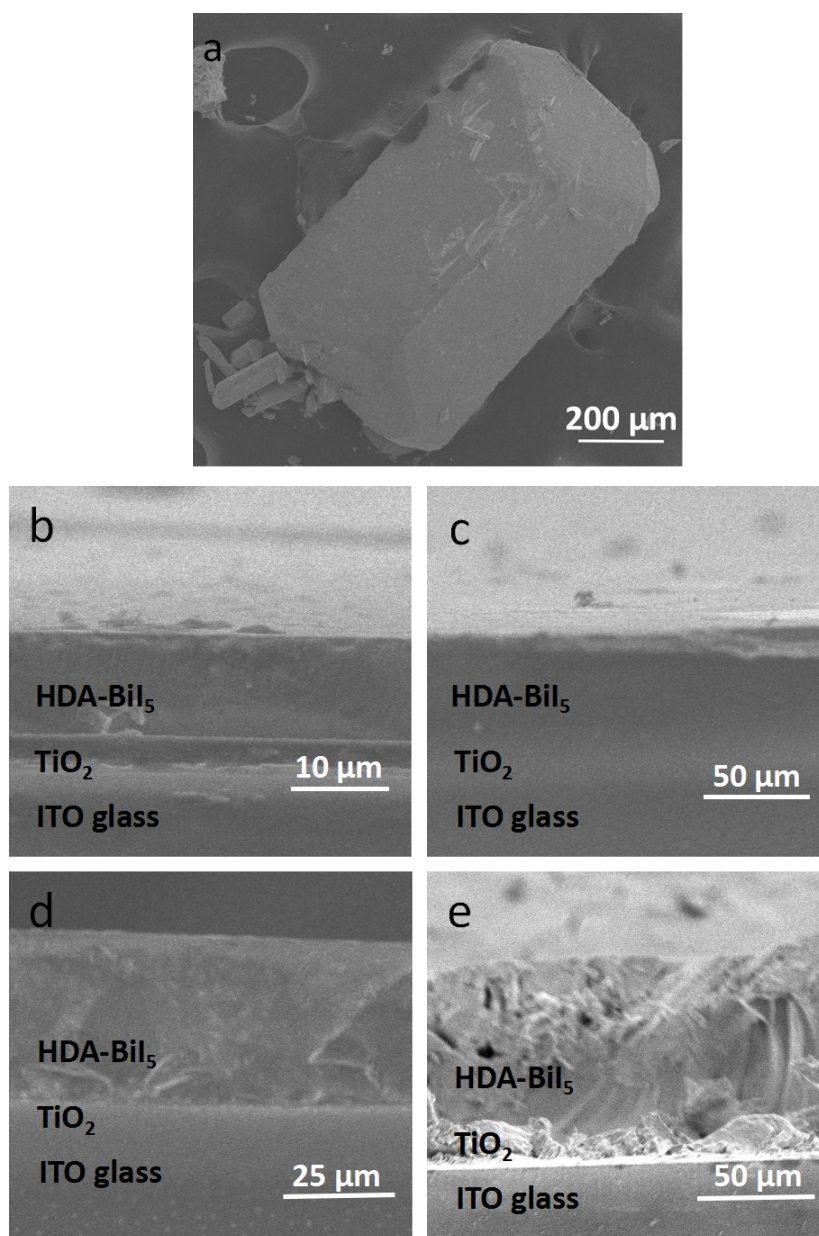

**Figure S3.** SEM images of HDA-BiI<sub>5</sub> single crystal (a) and HDA-BiI<sub>5</sub>/TiO<sub>2</sub> films with different thicknesses of 10 μm (b), 35 μm (b), 45 μm (c) and 70 μm (e).

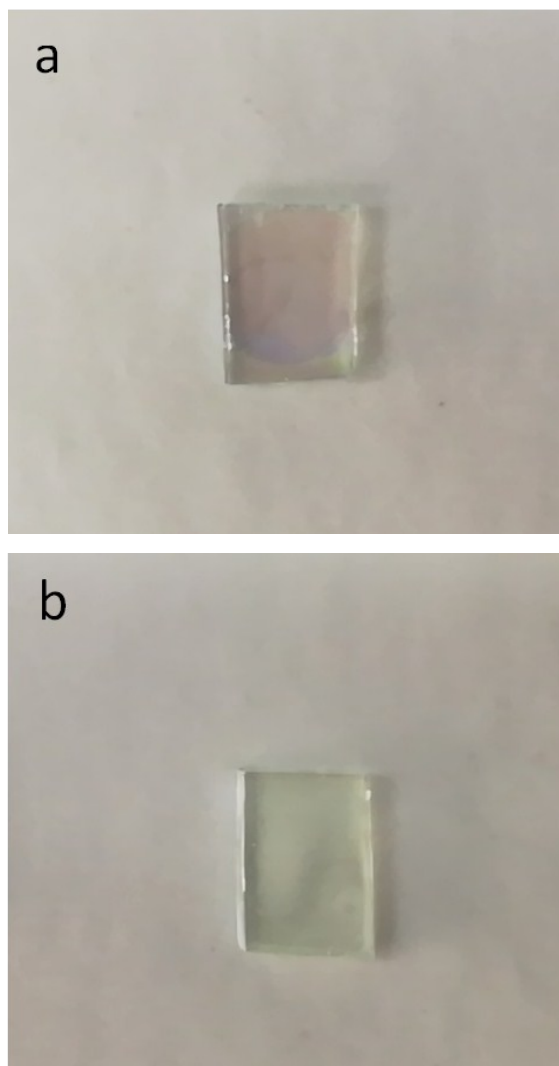

**Figure S4.** Optical photographs of  $\text{TiO}_2$  thin-film before (a) and after (b) hydrothermal retreatment.

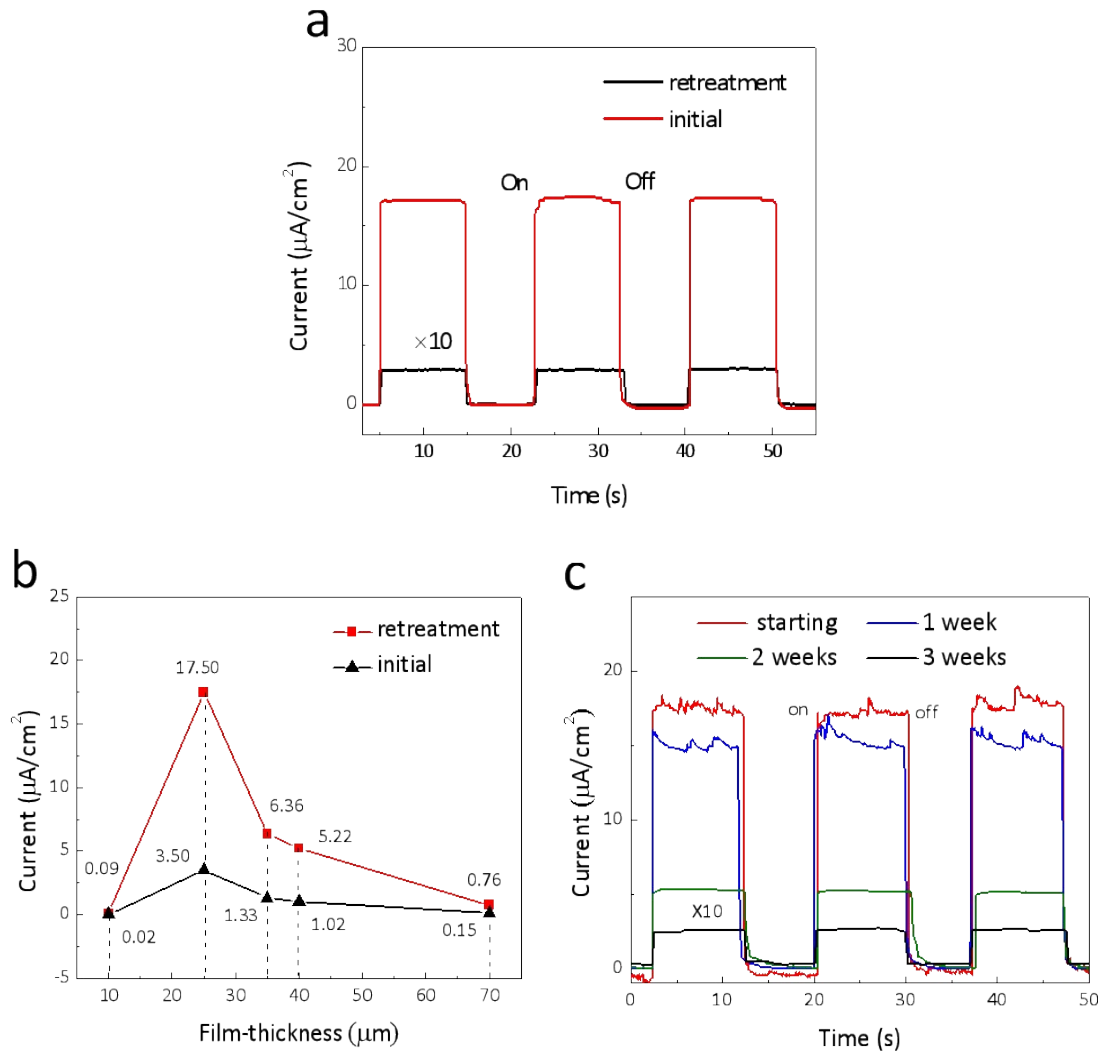

**Figure S5.** (a)  $J$ - $t$  curves of the (HAD-BiI<sub>5</sub>)-based solar device with a HAD-BiI<sub>5</sub> film thickness of 25  $\mu\text{m}$  before and after hydrothermal retreatment for TiO<sub>2</sub> ETL. (b) The evolution of the photocurrent density of the (HAD-BiI<sub>5</sub>)-based solar device with different HAD-BiI<sub>5</sub> film thicknesses before and after hydrothermal retreatment for TiO<sub>2</sub> ETL. (c)  $J$ - $t$  curves of the (HAD-BiI<sub>5</sub>)-based solar device after exposing to air for different time at zero bias voltage under on-off sunlight simulator illumination.

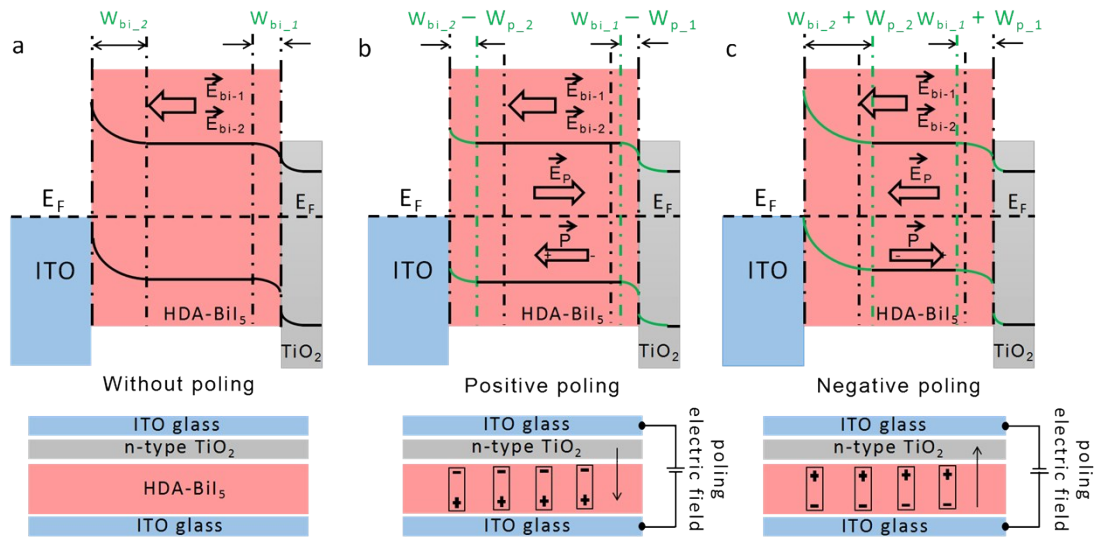

**Figure S6.** Schematic and band diagram of (HDA-BiI<sub>5</sub>)-based ferroelectric solar cells under different poling conditions: (a) without poling, (b) Positive poling, and (c) Negative poling .
